# Supplementary material for: The Association between Arrhythmia and Helicobacter pylori Infection: A Meta-Analysis of Case-Control Studies
Source: MDPI journal article supplement (doi:10.3390/ijerph13111139), 2016-11-16
Supplement: s1 [file s1]

# Supplementary Materials: The Association between Arrhythmia and *Helicobacter pylori* Infection: A Meta-Analysis of Case-Control Studies

Jin Yan, Qiang She, Yifeng Zhang, Chang Cui and Guoxin Zhang

**Table S1.** The demographic characteristics of the populations of the studies.

| Author                | Group   | Mean Age (Year) | Gender (Proportion of Man) |
|-----------------------|---------|-----------------|----------------------------|
| Badran et al. [16]    | AF      | 62 ± 4          | 54.88%                     |
|                       | Control | 66 ± 3          | 60.00%                     |
| Bunch et al. [17]     | AF      | 70.9 ± 9.5      | 75.90%                     |
|                       | Control | 63.9 ± 10.7     | 76.67%                     |
| Lunetta et al. [18]   | NG      | NG              | NG                         |
|                       | NG      | NG              | NG                         |
| Platonov et al. [10]  | AF      | 69.6 ± 8.3      | 68.06%                     |
|                       | Control | 69.8 ± 7.5      | 72.22%                     |
| Ki et al. [19]        | AF      | 61.28 ± 1.35    | 61.67%                     |
|                       | Control | 50.64 ± 2.18    | 41.67%                     |
| Franceschi et al. [9] | IA      | 44 ± 17         | 74.07%                     |
|                       | Control | 45 ± 9          | 68.00%                     |
| Wang et al. [20]      | AF      | 63.8 ± 10.8     | 38.60%                     |
|                       | Control | 60.2 ± 10.65    | 51.52%                     |

AF, atrial fibrillation; IA, idiopathic dysrhythmias; NG, not given.
